# Supplementary material for: Tubulointerstitial nephritis antigen-like 1 protein is downregulated in the placenta of pre-eclamptic women
Source: PubMed Central journal article supplement (PMC5361709; doi:10.1186/s12014-017-9144-2), 2017-03-21
Supplement: 12014_2017_9144_MOESM1_ESM.pdf [file 12014_2017_9144_MOESM1_ESM.pdf]

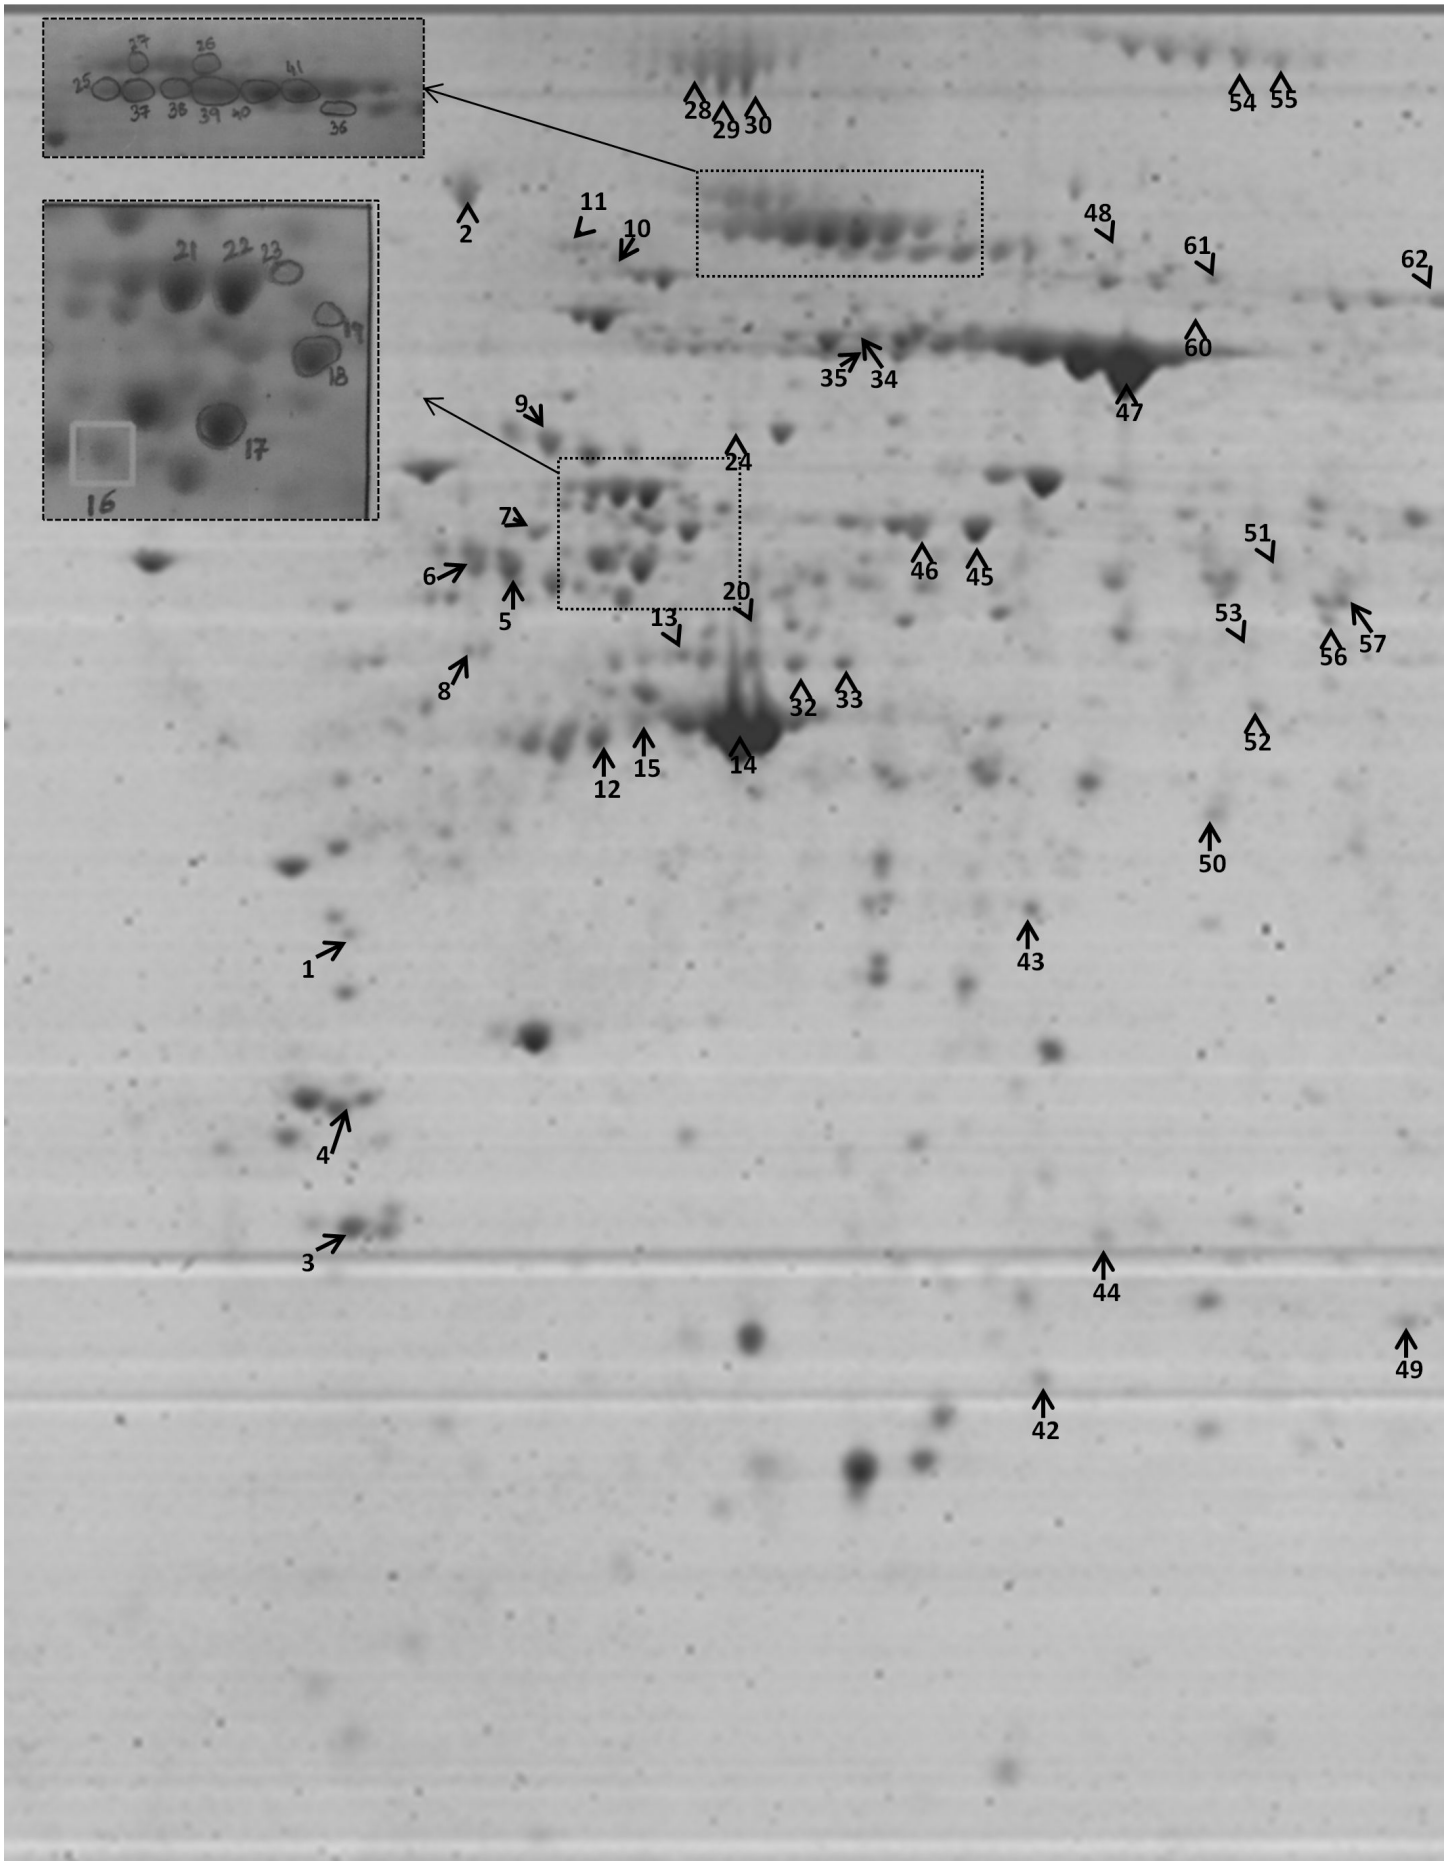

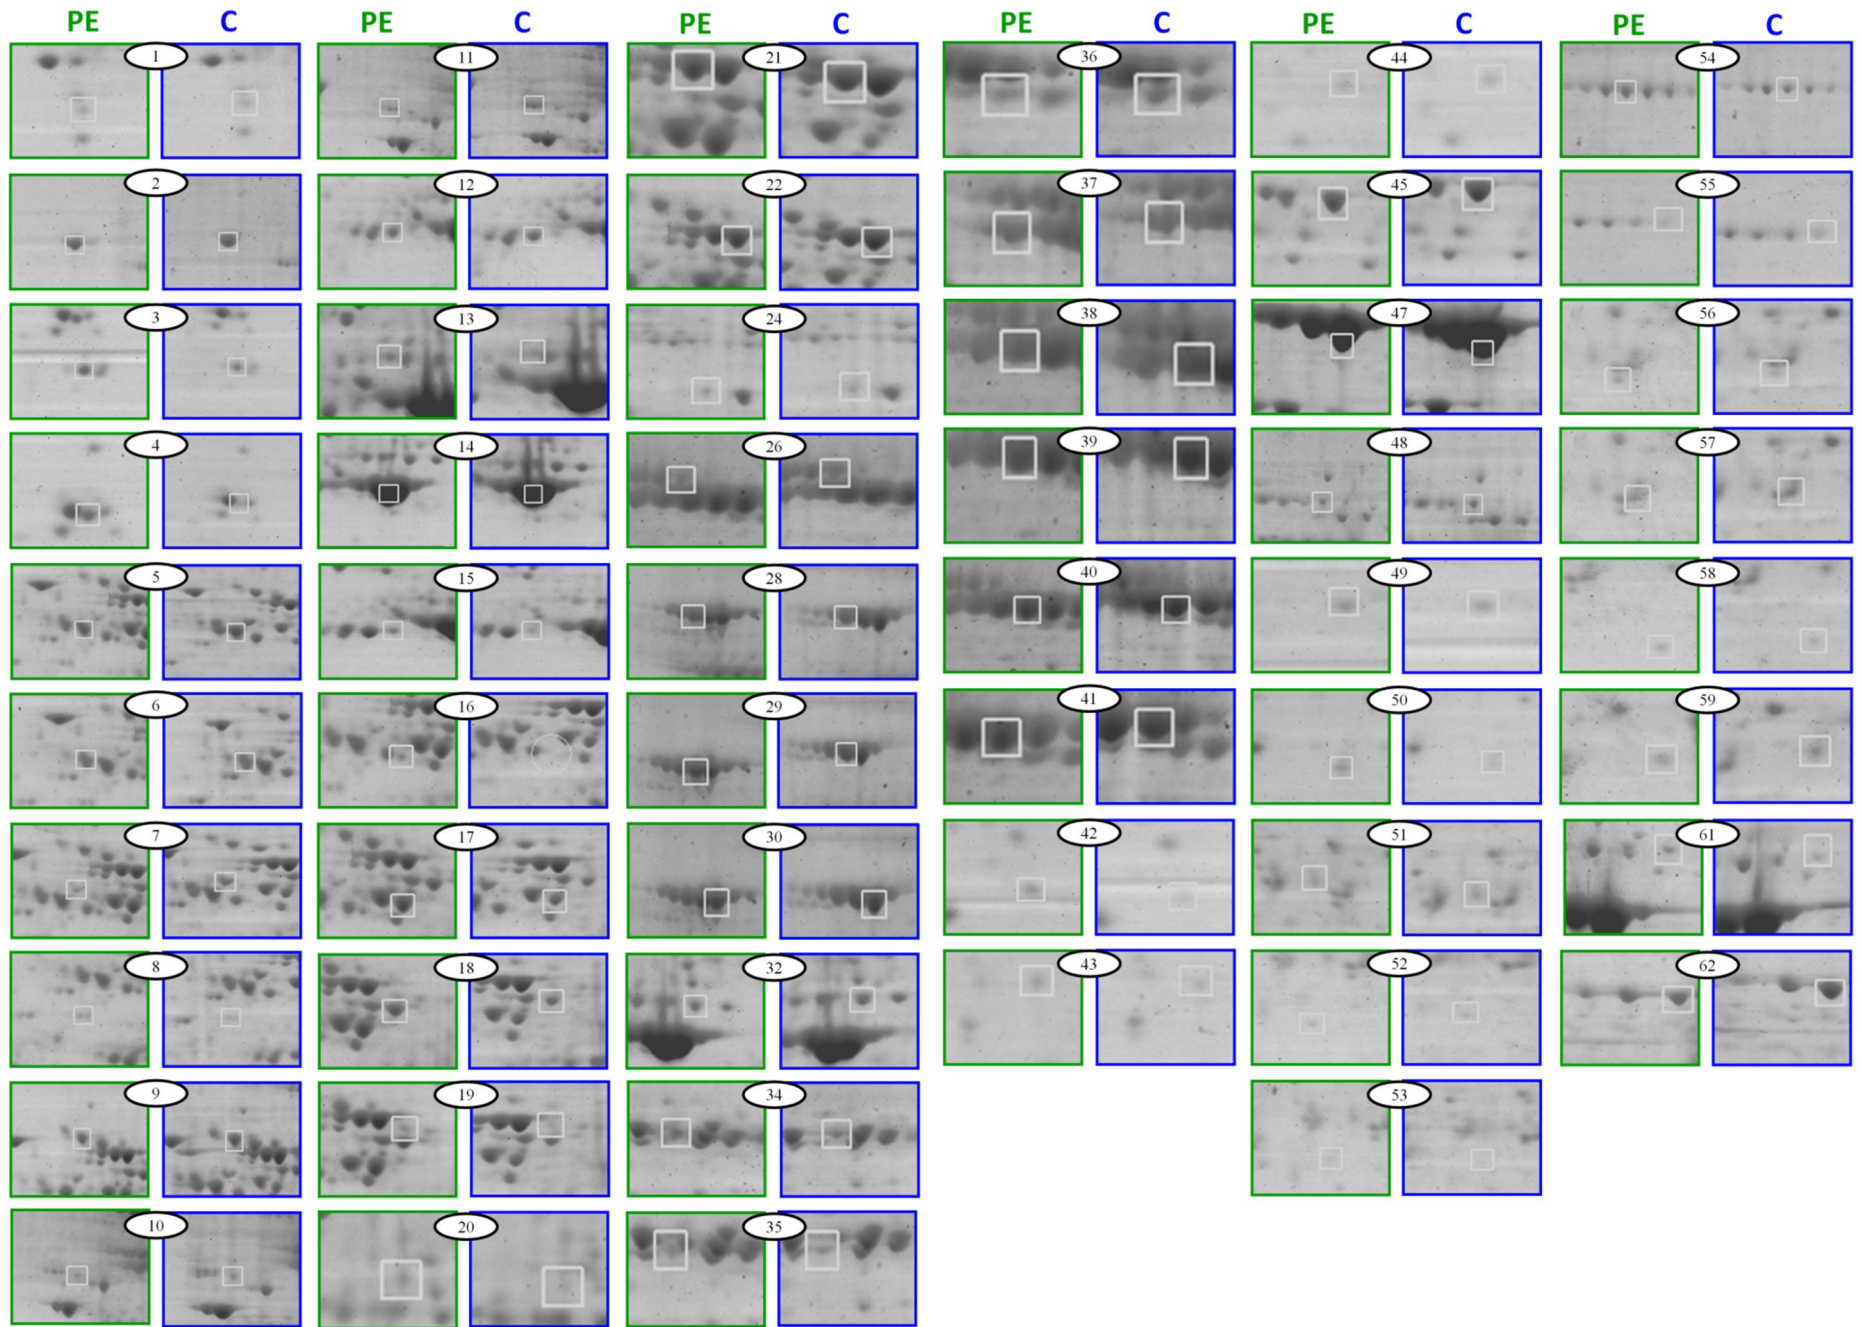

**Table: LC-MS<sup>E</sup> identification of differentially expressed proteins in normal versus pre-eclamptic pregnancies.** Protein identification was done using PLGS and the number of unique peptides identified using PepServe software. In the column with fold change, ↑ represents up regulation and ↓ represents down regulation. ( ) consists of total peptide identified by PLGS which includes more than twice identification of same peptide.

| Spot No. | Accession No. | Protein description                           | MW    | pI  | Sequence coverage (%) | Unique peptide (Total peptide identified) | Fold change PE/C | p value |
|----------|---------------|-----------------------------------------------|-------|-----|-----------------------|-------------------------------------------|------------------|---------|
| 1        | P09493        | Isoform 3,9,8 of Tropomyosin alpha 1 chain    | 32855 | 4.5 | 33.1                  | (17)                                      | 1.5↑             | 0.031   |
| 2        | P14625        | Endoplasmin                                   | 92411 | 4.6 | 63.6                  | 22(198)                                   | 1.8↓             | 0.007   |
| 3        | P63104        | 14 3 3 protein zeta delta                     | 27727 | 4.5 | 64.1                  | 6(46)                                     | 1.6↑             | 0.049   |
|          | Q04917        | 14 3 3 protein eta                            | 28201 | 4.6 | 28.5                  | 3(15)                                     |                  |         |
|          | P61981        | 14 3 3 protein gamma                          | 28284 | 4.6 | 23.9                  | 2(15)                                     |                  |         |
| 4        | P67936        | Tropomyosin alpha 4 chain                     | 28504 | 4.5 | 22.2                  | 3(8)                                      | 2.5↑             | 0.289   |
| 5        | P01009        | Alpha 1 antitrypsin                           | 46707 | 5.2 | 59.6                  | 12(103)                                   | 1.7↓             | 0.013   |
| 6        | P01009        | Alpha 1 antitrypsin                           | 46707 | 5.2 | 54.8                  | 15(84)                                    | 1.5↓             | 0.000   |
| 7        | P07437        | Tubulin beta chain                            | 49638 | 4.6 | 73.9                  | 4(55)                                     | 1.9↓             | 0.000   |
| 9        | P01009        | Alpha 1 antitrypsin                           | 46707 | 5.2 | 65.1                  | 16(91)                                    | 1.5↓             | 0.287   |
| 10       | P21980        | Protein glutamine gamma glutamyltransferase 2 | 77279 | 4.9 | 33.9                  | 11(25)                                    | 2.1↓             | 0.004   |
| 11       | P08238        | Heat shock protein HSP 90 beta                | 83212 | 4.8 | 58.1                  | 8(96)                                     | 1.7↓             | 0.005   |
|          | P07900        | Heat shock protein HSP 90 alpha               | 84606 | 4.7 | 52.9                  | 7(80)                                     |                  |         |
| 12       | P60709        | Actin cytoplasmic 1                           | 41709 | 5.1 | 69.3                  | (42)                                      | 2.8↓             | 0.015   |
| 13       | P63261        | Actin cytoplasmic 2                           | 41765 | 5.2 | 22.4                  | (10)                                      | 2.7↑             | 0.021   |
| 14       | P60709        | Actin cytoplasmic 1                           | 41709 | 5.1 | 80.8                  | (115)                                     | 3.0↓             | 0.156   |
|          | P63261        | Actin cytoplasmic 2                           | 41765 | 5.2 | 80.8                  | (155)                                     |                  |         |
| 15       | P60709        | Actin cytoplasmic 1                           | 41709 | 5.1 | 72.8                  | (52)                                      | 1.8↑             | 0.313   |
|          | P68032        | Actin alpha cardiac muscle 1                  | 41991 | 5.1 | 65.8                  | (50)                                      |                  |         |
| 16       | Q15084        | Protein disulfide isomerase A6                | 48091 | 4.8 | 29.8                  | 8(10)                                     | 3.1↑             | 0.000   |

|           |          |                                           |        |     |      |         |      |       |
|-----------|----------|-------------------------------------------|--------|-----|------|---------|------|-------|
| <b>17</b> | Q15084   | Protein disulfide isomerase A6            | 48091  | 4.8 | 48.6 | 8(16)   |      |       |
| <b>18</b> | P17661   | Desmin                                    | 53503  | 5.0 | 61.1 | 16(49)  |      |       |
|           | P02774   | Vitamin D binding protein                 | 52929  | 5.2 | 61.6 | 8(48)   |      |       |
|           | P17661   | Desmin                                    | 53503  | 5.0 | 58.1 | 9(51)   |      |       |
| <b>20</b> | Q8NBS9   | Thioredoxin domain containing protein 5   | 47598  | 5.6 | 45.8 | 10(38)  | 3.1↑ | 0.003 |
| <b>24</b> | P10809   | 60 kDa heat shock protein mitochondrial   | 61016  | 5.6 | 75.9 | 22(74)  | 1.6↑ | 0.358 |
| <b>26</b> | O43707   | Alpha actinin 4                           | 104788 | 5.1 | 81.6 | 25(112) | 3.2↓ | 0.041 |
| <b>28</b> | P12109   | Collagen alpha 1 VI chain                 | 108461 | 5.1 | 61.7 | 27(138) | 1.5↓ | 0.001 |
|           | Q05707-3 | Isoform 3 of Collagen alpha 1 XIV chain   | 183037 | 5.0 | 26.0 | (35)    |      |       |
|           | Q9Y4L1   | Hypoxia up regulated protein 1            | 111266 | 5.0 | 38.8 | 11(30)  |      |       |
|           | P35579   | Myosin 9                                  | 226390 | 5.3 | 32.6 | 22(83)  |      |       |
| <b>29</b> | P12109   | Collagen alpha 1 VI chain                 | 108461 | 5.1 | 53.9 | 21(120) | 1.5↓ | 0.093 |
| <b>30</b> | P12109   | Collagen alpha 1 VI chain                 | 108461 | 5.1 | 51.0 | 21(114) | 2.0↓ | 0.007 |
| <b>32</b> | Q12905   | Interleukin enhancer binding factor 2     | 43035  | 5.0 | 38.7 | 8(11)   | 1.5↓ | 0.006 |
| <b>34</b> | P08133   | Annexin A6                                | 75825  | 5.3 | 81.9 | 30(131) | 1.8↑ | 0.037 |
|           | P08133-2 | Isoform 2 of Annexin A6                   | 72378  | 5.3 | 78.0 | 29(128) |      |       |
|           | P11142   | Heat shock cognate 71 kDa protein         | 70854  | 5.2 | 64.6 | 10(64)  |      |       |
| <b>35</b> | Q03252   | Lamin B2                                  | 67647  | 5.1 | 62.5 | (62)    | 1.8↑ | 0.065 |
|           | P08107   | Heat shock 70 kDa protein 1A 1B           | 70009  | 5.3 | 52.1 | (42)    |      |       |
|           | P08133-2 | Isoform 2 of Annexin A6                   | 72378  | 5.3 | 45.4 | 13(28)  |      |       |
| <b>36</b> | P02679   | Fibrinogen gamma chain                    | 51478  | 5.2 | 60.9 | (69)    | 1.7↓ | 0.050 |
| <b>37</b> | P02679-2 | Isoform Gamma A of Fibrinogen gamma chain | 49464  | 5.6 | 69.1 | (55)    | 1.8↑ | 0.169 |
|           | P55072   | Transitional endoplasmic reticulum ATPase | 89265  | 5.0 | 81.9 | (133)   |      |       |
| <b>38</b> | P02679-2 | Isoform Gamma A of Fibrinogen gamma chain | 49464  | 5.6 | 73.7 | (112)   | 1.5↓ | 0.205 |
|           | O43707   | Alpha actinin 4                           | 104788 | 5.1 | 61.0 | (65)    |      |       |
|           | P55072   | Transitional endoplasmic reticulum ATPase | 89265  | 5.0 | 42.9 | (27)    |      |       |
| <b>39</b> | P02679-2 | Isoform Gamma A of Fibrinogen gamma chain | 49464  | 5.6 | 70.0 | (108)   | 1.7↓ | 0.013 |
|           | O43707   | Alpha actinin 4                           | 104788 | 5.1 | 68.7 | (80)    |      |       |
|           | P55072   | Transitional endoplasmic reticulum ATPase | 89265  | 5.0 | 36.6 | (28)    |      |       |

|           |          |                                                                |        |     |      |        |       |       |
|-----------|----------|----------------------------------------------------------------|--------|-----|------|--------|-------|-------|
|           | P01023   | Alpha 2 macroglobulin                                          | 163187 | 6.0 | 22.9 | (32)   |       |       |
|           | P35609   | Alpha actinin 2                                                | 103788 | 5.2 | 19.2 | (15)   |       |       |
| <b>40</b> | P02679-2 | Isoform Gamma A of Fibrinogen gamma chain                      | 49464  | 5.6 | 60.9 | (122)  | 1.5↓  | 0.065 |
|           | O43707   | Alpha actinin 4                                                | 104788 | 5.1 | 61.5 | (66)   |       |       |
|           | P01023   | Alpha 2 macroglobulin                                          | 163187 | 6.0 | 34.9 | (36)   |       |       |
|           | P12814-2 | Isoform 2 of Alpha actinin 1                                   | 102644 | 5.2 | 33.5 | (29)   |       |       |
|           | P55072   | Transitional endoplasmic reticulum ATPase                      | 89265  | 5.0 | 57.1 | (37)   |       |       |
|           | P35609   | Alpha actinin 2                                                | 103788 | 5.2 | 25.7 | (19)   |       |       |
|           | Q08043   | Alpha actinin 3                                                | 103176 | 5.2 | 21.2 | (19)   |       |       |
| <b>41</b> | P02679-2 | Isoform Gamma A of Fibrinogen gamma chain                      | 49464  | 5.6 | 60.2 | (108)  | 1.5↓  | 0.037 |
|           | P55072   | Transitional endoplasmic reticulum ATPase                      | 89265  | 5.0 | 44.9 | (40)   |       |       |
|           | P01023   | Alpha 2 macroglobulin                                          | 163187 | 6.0 | 25.1 | (31)   |       |       |
| <b>42</b> | P02768   | Serum albumin                                                  | 69321  | 5.9 | 29.6 | 7(53)  | 12.5↑ | 0.183 |
| <b>43</b> | P07195   | L lactate dehydrogenase B chain                                | 36615  | 5.6 | 62.3 | 12(75) | 3.3↑  | 0.178 |
| <b>44</b> | P30040   | Endoplasmic reticulum resident protein 29                      | 28975  | 7.3 | 56.7 | 9(44)  | 2.0↑  | 0.165 |
| <b>45</b> | P49189   | 4 trimethylaminobutyraldehyde dehydrogenase                    | 53767  | 5.6 | 39.7 | 8(30)  | 2.3↓  | 0.021 |
| <b>47</b> | P02768   | Serum albumin                                                  | 69321  | 5.9 | 86.7 | (260)  | 3.5↓  | 0.000 |
| <b>48</b> | P06396-2 | Isoform 2 of Gelsolin                                          | 80590  | 5.5 | 60.9 | 20(84) | 1.6↓  | 0.394 |
| <b>49</b> | P30041   | Peroxiredoxin 6                                                | 25019  | 6.0 | 83.0 | 10(61) | 2.4↑  | 0.119 |
| <b>50</b> | P02675   | Fibrinogen beta chain                                          | 55892  | 8.3 | 51.3 | 11(92) | 2.4↑  | 0.218 |
|           | Q15257-2 | Isoform 1 of Serine threonine protein phosphatase 2A activator | 36751  | 5.9 | 49.8 | 11(24) |       |       |
|           | P37837   | Transaldolase                                                  | 37516  | 6.4 | 38.3 | 9(19)  |       |       |
| <b>51</b> | Q9GZM7   | Tubulointerstitial nephritis antigen-like                      | 52352  | 6.5 | 40.3 | 6(43)  | 1.6↓  | 0.004 |
| <b>52</b> | P23526   | Adenosylhomocysteinase                                         | 47685  | 5.9 | 45.4 | 14(70) | 2.4↑  | 0.010 |
| <b>53</b> | P02675   | Fibrinogen beta chain                                          | 55892  | 8.3 | 30.3 | 6(15)  | 3.0↑  | 0.065 |
| <b>54</b> | P12110   | Collagen alpha 2 VI chain                                      | 108511 | 5.8 | 28.9 | (65)   | 2.6↑  | 0.003 |
| <b>55</b> | P12110   | Collagen alpha 2 VI chain                                      | 108511 | 5.8 | 34.2 | (70)   | 2.6↑  | 0.155 |
| <b>56</b> | P50395   | Rab GDP dissociation inhibitor beta                            | 50630  | 6.1 | 83.1 | 6(76)  | 1.5↑  | 0.235 |
|           | P02675   | Fibrinogen beta chain                                          | 55892  | 8.3 | 65.2 | 14(78) |       |       |

---

|           |          |                                    |       |     |      |         |      |       |
|-----------|----------|------------------------------------|-------|-----|------|---------|------|-------|
| <b>57</b> | P02675   | Fibrinogen beta chain              | 55892 | 8.3 | 71.1 | 14(106) | 2.0↓ | 0.101 |
| <b>58</b> | P61163   | Alpha centractin                   | 42586 | 6.2 | 72.3 | 10(57)  | 2.7↑ | 0.005 |
|           | P27361   | Mitogen activated protein kinase 3 | 43108 | 6.3 | 55.1 | 9(35)   |      |       |
| <b>59</b> | P02675   | Fibrinogen beta chain              | 55892 | 8.3 | 78.8 | 14(92)  | 1.6↓ | 0.029 |
|           | Q9NVA2   | Septin 11                          | 49367 | 6.4 | 32.9 | 4(18)   |      |       |
| <b>61</b> | P06396-2 | Isoform 2 of Gelsolin              | 80590 | 5.5 | 50.3 | 18(82)  | 3.2↑ | 0.001 |
|           | P02786   | Transferrin receptor protein 1     | 84818 | 6.2 | 38.4 | 22(48)  |      |       |
| <b>62</b> | P02787   | Serotransferrin                    | 77013 | 6.8 | 60.0 | 17(171) | 2.2↓ | 0.016 |

---
